# Supplementary material
Source: PubMed Central journal article supplement (PMC9164017)
Supplement: NIHMS1809691-supplement-List_of_reagents.pdf [file NIHMS1809691-supplement-List_of_reagents.pdf]

|                                                                  | SOURCE                                   | IDENTIFIER  |
|------------------------------------------------------------------|------------------------------------------|-------------|
| <b>Chemicals and peptides</b>                                    |                                          |             |
| 2-mercaptoethanol                                                | ThermoFisher Scientific                  | #21985023   |
| DMEM/F-12                                                        | ThermoFisher Scientific                  | #11330032   |
| Dimethylsulfoxide (DMSO)                                         | Sigma                                    | #D2650      |
| Tetrahydrofuran (THF)                                            | Sigma                                    |             |
| N,N-diisopropylethylamine (DIPEA)                                | Sigma                                    |             |
| Fungizone/Amphotericin B                                         |                                          | #15290018   |
| Glasgow MEM, G-MEM                                               | ThermoFisher Scientific                  | #11710035   |
| GlutaMAX Supplement                                              | ThermoFisher Scientific                  | #35050061   |
| UltraPure DNase/RNase-free Distilled Water                       | ThermoFisher Scientific                  | #10977015   |
| Heparin                                                          | Sigma                                    | #H3149      |
| Hyclone Fetal Bovine Serum                                       | ThermoFisher Scientific                  | #SH30070.03 |
| MycoAlert PLUS mycoplasma detection kit                          | Lonza                                    | #LT07705    |
| N-2 Supplement, 100X                                             | Life Technologies                        | #17502048   |
| PBS, phosphate buffered saline                                   | ThermoFisher Scientific                  | #10010023   |
| Penicillin/Streptomycin Solution 100X                            | Corning                                  | #30002CI    |
| Sodium Pyruvate                                                  | ThermoFisher Scientific                  | #11360070   |
| Trypan blue solution                                             | ThermoFisher Scientific                  | #15250061   |
| DMEM glutamax                                                    | ThermoFisher Scientific                  | #10566016   |
| Dulbecco's Phosphate Buffered Saline, DPBS                       | ThermoFisher Scientific                  | # 14287-080 |
| Opti-MEM                                                         | ThermoFisher Scientific                  | #31985062   |
| Fetal Bovine Serum Heat inactivated, HI FBS                      | ThermoFisher Scientific                  | #10082-147  |
| Geneticin                                                        | ThermoFisher Scientific                  | #10131027   |
| Formaldehyde Solution 10%                                        | Macron Fine Chemicals                    | #0000178134 |
| 4-,6/Diamidino/2/phenylindole, DAPI                              | ThermoFisher Scientific                  | #VC2962251  |
| Sodium Azide                                                     | Acros Organics                           | #A015139301 |
| GlutaMAX minimal essential medium                                | ThermoFisher Scientific                  | #42360081   |
| HEPES                                                            | ThermoFisher Scientific                  | #153630080  |
| turbo Dnasil                                                     | ThermoFisher Scientific                  | #AM2239     |
| SuperScriptIII First-Strand                                      | ThermoFisher Scientific                  | #2041116    |
| Platinum <sup>R</sup> SYBR <sup>R</sup> Green                    | ThermoFisher Scientific                  | #2152624    |
| Lipofectamine                                                    | ThermoFisher Scientific                  | #2167711    |
| HRC4                                                             | American Peptide Company (Sunnyvale, CA) | Custom made |
| N-(3-Cyanophenyl)-2-phenylacetamide, 3G                          | ZereneX Molecular Limited (UK)           | ZX-AH001571 |
| Peptides                                                         | Shangai Ruifu Chemical Co.               |             |
| Bromoacetyl cholesterol and Bismaleimide cholesterol derivatives | Charnwood Molecular Ltd                  |             |
| Zanamavir (GG-167)                                               | Acme bioscience Inc.                     | #168200     |

|                                                   |                                             |            |
|---------------------------------------------------|---------------------------------------------|------------|
|                                                   |                                             |            |
| <b>Antibodies</b>                                 |                                             |            |
| Pre-fusion conformation specific mouse mAb (77.4) | Horvat Lab                                  |            |
| HRC-Rabbit polyclonal serum                       |                                             |            |
| Alexa Fluor™ 488 goat anti-mouse IgG (H+L)        | ThermoFisher Scientific                     | #2140660   |
| Alexa Fluor™ 594 goat anti-rabbit IgG (H+L)       | ThermoFisher Scientific                     | #2069816   |
|                                                   |                                             |            |
| <b>Virus strains</b>                              |                                             |            |
| Measles wild type - strain WTFb                   | Niewiesk Lab                                |            |
|                                                   |                                             |            |
| <b>Critical Commercial Assays</b>                 |                                             |            |
| Galacto-Star™ System                              | ThermoFisher Scientific (Applied BioSystem) | T1056      |
| MTT Cell Viability Assay Kit                      | ThermoFisher Scientific                     | #2167186   |
| MycoAlert™ Mycoplasma Detection Kit               | Lonza                                       | LT07-218   |
|                                                   |                                             |            |
| <b>Cell line and organotypic cultures</b>         |                                             |            |
| VERO                                              | ATCC                                        |            |
| VERO SLAM/CD150                                   | Porotto Lab                                 |            |
| VERO Nectin4                                      | Porotto Lab                                 |            |
| HEK 293T                                          | ATCC                                        |            |
|                                                   |                                             |            |
| <b>Animal model</b>                               |                                             |            |
| Cotton rat ( <i>Sigmodon hispidus</i> )           | Envigo, Inc, Indianapolis                   |            |
|                                                   |                                             |            |
| <b>Recombinant DNA</b>                            |                                             |            |
| pCAGGS MeV (IC323) H                              | epochlifescience.com                        | GS50757-3  |
| pCAGGS MeV (IC323) F wt                           | epochlifescience.com                        | GS50757-1  |
| pCAGGS MeV (IC323) F_L454W                        | epochlifescience.com                        | GS55026-2  |
| pCAGGS MeV (B3) H                                 | epochlifescience.com                        | GS55587    |
| pCAGGS MeV (B3) F wt                              | epochlifescience.com                        | GS63325-1  |
| pCAGGS MeV (B3) F_L454W Patient2 B3               | epochlifescience.com                        | GS55608    |
| pCAGGS Nectin4-PVRL4-Venus                        | epochlifescience.com                        | GS61333-1  |
| pCAGGS-Neo-CD150_SLAM_Venus                       | epochlifescience.com                        | GS61333-2  |
| pCAGGS -Chimera-MV-H_Y17H (1-160)_HPIV3-T193A     | epochlifescience.com                        | GS55221-2  |
| pCAGGS - MeV (IC323) F_S262R                      | epochlifescience.com                        | GS55026-1  |
| pCAGGS                                            | epochlifescience.com                        | GS61265-1  |
| mcherry                                           | epochlifescience.com                        | GS63763-6  |
| pCAGGS Alpha (Beta-Gal)                           | epochlifescience.com                        | GS51371-2  |
| pCAGGS Omega (Beta-Gal)                           | epochlifescience.com                        | GS51371-10 |

|                                |                      |                                                                                                                   |
|--------------------------------|----------------------|-------------------------------------------------------------------------------------------------------------------|
| pCAGGS RSV F                   | epochlifescience.com | GS51371-5                                                                                                         |
| <b>Software and Algorithms</b> |                      |                                                                                                                   |
| CellProfiler™                  |                      | <a href="https://cellprofiler.org/">https://cellprofiler.org/</a>                                                 |
| Imagej                         |                      | <a href="https://imagej.nih.gov/ij/">https://imagej.nih.gov/ij/</a>                                               |
| GraphPad Prism 5               | GraphPad Prism       | <a href="http://www.graphpad.com/scientific-software/prism">http://www.graphpad.com/scientific-software/prism</a> |
| FlowJo v10                     |                      | <a href="https://www.flowjo.com">https://www.flowjo.com</a>                                                       |
